# Supplementary material
Source: HighWire-hosted journal article supplement (https://qdcxjkg.com/highwire/filestream/112851/field_highwire_adjunct_files/2/Table_E1_nov2_2005.pdf)
Supplement: Table_E1_nov2_2005.pdf [file Table_E1_nov2_2005.pdf]

**Table E1. Asthma severity\* at maintenance and corresponding daily doses of fluticasone equivalent**

|                                         |           | n (%)     | ICS dose, µg/day** |
|-----------------------------------------|-----------|-----------|--------------------|
| <b><u>Asthma severity</u></b>           |           |           |                    |
| <b>Very mild</b>                        | <b>CS</b> | 4 (7.7)   | None               |
|                                         | <b>SS</b> | 3 (6.0)   | None               |
| <b>Mild</b>                             | <b>CS</b> | 11 (21.2) | 250 (125;250)      |
|                                         | <b>SS</b> | 13 (26.0) | 250 (125;250)      |
| <b>Moderate</b>                         | <b>CS</b> | 11 (21.2) | 500 (375;500)      |
|                                         | <b>SS</b> | 8 (16.0)  | 500 (500;500)***   |
| <b>Severe</b>                           | <b>CS</b> | 26 (50.0) | 1000 (750;2000)    |
|                                         | <b>SS</b> | 26 (52.0) | 1000 (750;2000)    |
| <b><u>Collapsed asthma severity</u></b> |           |           |                    |
| <b>Very mild to mild</b>                | <b>CS</b> | 15 (28.8) | 250 (0;250)        |
|                                         | <b>SS</b> | 16 (32.0) | 250 (0;250)        |
| <b>Moderate to severe</b>               | <b>CS</b> | 34 (68.0) | 1000 (500;2000)    |
|                                         | <b>SS</b> | 37 (71.2) | 1000 (500;2000)    |

\*Asthma severity was based on minimum **daily** maintenance fluticasone equivalent dose: very mild = 0, mild = ≤ 250 µg, moderate = >250 – 500 µg; severe = >500 µg.

**ICS = inhaled corticosteroid**

\*\* expressed as median (10 and 90 percentiles)

\*\*\* median (25 and 90 percentiles)
